# Supplementary material
Source: Springer Nature journal article supplement (https://www.springermedizin.de/resource/supplementary/13075_2011_3649_MOESM5_ESM.pdf/9695040)

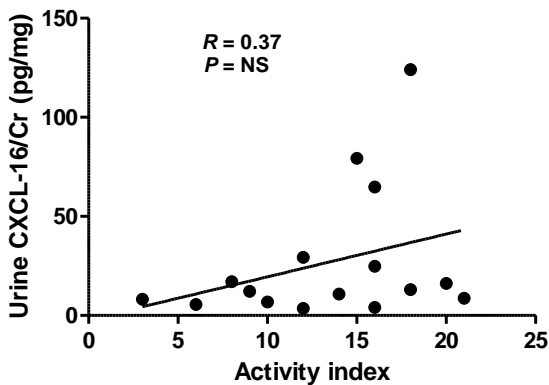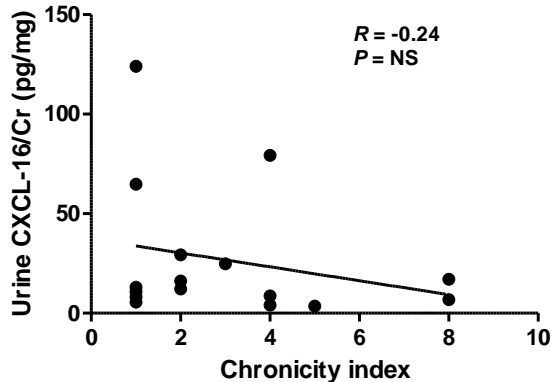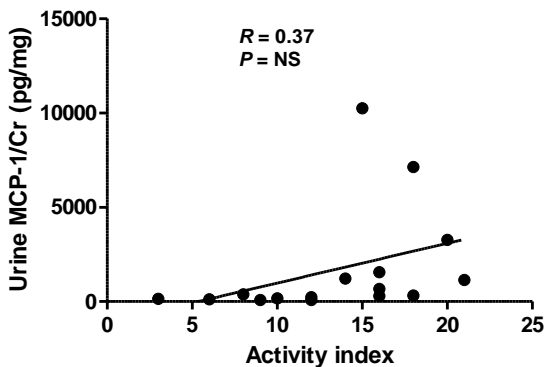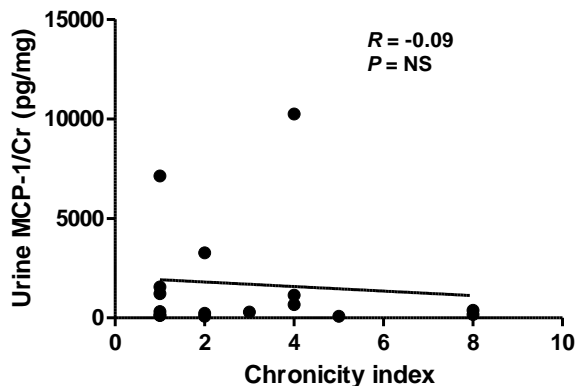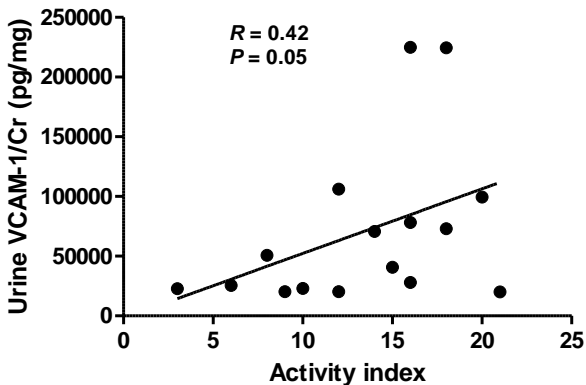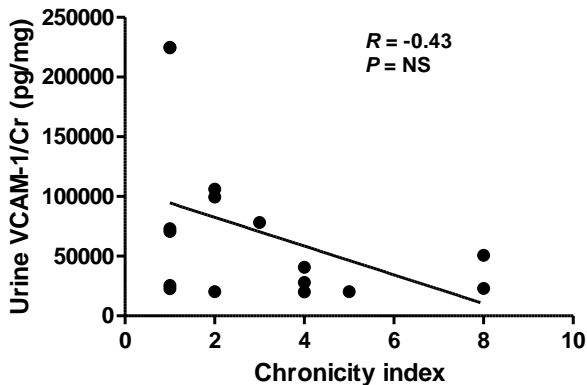

## Concurrent Renal Pathology

Supplement: MOESM5 [file 9695040]
